# Supplementary material for: Neural Correlates of Numerical Estimation: The Role of Strategy Use
Source: MDPI journal article supplement (doi:10.3390/brainsci12030357), 2022-03-07
Supplement: s1 [file s1]

**Table S1.** Brain areas that showed significant activation in approximate calculation block (thresholding at  $p < 0.001$ ).

| Region                       | Hem. | BA | Number of Voxels | Peak Talairach X | Coordinates Y | Z   | Peak t(18) Score |
|------------------------------|------|----|------------------|------------------|---------------|-----|------------------|
| <i>Activations</i>           |      |    |                  |                  |               |     |                  |
| Middle frontal gyrus         | R    | 9  | 20,264           | 36               | 35            | 31  | 9.734            |
| Insula                       | R    |    |                  | 29               | 20            | 8   | 7.256            |
| Middle frontal gyrus         | L    | 9  | 16,559           | -40              | 36            | 26  | 6.344            |
| Inferior frontal gyrus       | L    | 46 |                  | -39              | 43            | 8   | 5.890            |
| Inferior frontal gyrus       | L    | 6  |                  | -35              | 1             | 25  | 5.228            |
| Intraparietal sulcus         | L    | 7  | 21,618           | -32              | -66           | 48  | 8.103            |
| Intraparietal sulcus         | L    | 19 |                  | -29              | -66           | 36  | 7.819            |
| Cuneus                       | L    | 7  |                  | -9               | -72           | 37  | 7.665            |
| Intraparietal sulcus         | L    | 40 |                  | -50              | -44           | 46  | 7.931            |
| Cuneus                       | R    | 7  |                  | 8                | -76           | 45  | 6.320            |
| Intraparietal sulcus         | R    | 7  |                  | 27               | -68           | 36  | 5.980            |
| Superior frontal gyrus       | L    | 8  | 5937             | 0                | 11            | 52  | 7.700            |
| Insula                       | L    |    | 6366             | -18              | 17            | 15  | 6.678            |
| Extra-nuclear/Corpus clausum | L    | 30 | 1604             | -21              | -37           | 7   | 6.912            |
| Fusiform gyrus               | R    | 37 | 44,616           | 47               | -52           | -14 | 8.720            |
| Fusiform gyrus               | L    | 18 |                  | -29              | -85           | -14 | 6.274            |
| Fusiform gyrus               | L    | 37 |                  | -48              | -49           | -17 | 6.625            |
| <i>Deactivations</i>         |      |    |                  |                  |               |     |                  |
| Middle temporal gyrus        | R    | 22 | 972              | 51               | -7            | -8  | 6.427            |
| Medial frontal gyrus         | L    | 10 | 2091             | -3               | 53            | 13  | 5.581            |

**Table S2.** Brain areas that showed significant activation in sense of magnitude block (thresholding at  $p < 0.001$ ).

| Region                     | Hem. | BA | Number of Voxels | Peak Talairach Coordinates |     |     | Peak t(18) Score |
|----------------------------|------|----|------------------|----------------------------|-----|-----|------------------|
|                            |      |    |                  | X                          | Y   | Z   |                  |
| <i>Activation</i>          |      |    |                  |                            |     |     |                  |
| Middle frontal gyrus       | R    | 10 | 23,254           | 36                         | 44  | 25  | 9.689            |
| Middle frontal gyrus       | R    | 6  |                  | 33                         | −1  | 52  | 6.213            |
| Middle frontal gyrus       | L    | 10 | 22,212           | −36                        | 38  | 22  | 9.249            |
| Superior frontal gyrus     | L    | 6  | 3359             | 3                          | 2   | 58  | 6.580            |
| Supramarginal gyrus        | R    | 40 | 50,916           | 30                         | −52 | 34  | 8.639            |
| Inferior parietal lobule   | L    | 40 |                  | −42                        | −46 | 37  | 7.289            |
| Inferior parietal lobule   | L    | 7  |                  | −34                        | −64 | 44  | 6.529            |
| Posterior cingulate cortex | R    | 23 |                  | 6                          | −10 | 25  | 5.439            |
| Insula                     | R    | 13 | 4009             | 36                         | 11  | 4   | 6.207            |
| Inferior occipital gyrus   | L    | 18 | 67,623           | −18                        | −91 | −17 | 11.845           |
| Inferior temporal gyrus    | L    | 21 |                  | −57                        | −33 | −13 | 7.162            |
| Lateral occipital gyrus    | L    | 37 |                  | −39                        | −62 | −14 | 6.724            |
| Inferior occipital gyrus   | R    | 18 |                  | 21                         | −91 | −13 | 7.267            |
| Lateral occipital gyrus    | R    | 37 |                  | 50                         | −49 | −11 | 6.331            |
| <i>Deactivation</i>        |      |    |                  |                            |     |     |                  |
| None                       |      |    |                  |                            |     |     |                  |

**Table S3.** Brain areas that showed significant differences between approximate calculations compared to sense of magnitude block (thresholding at  $p < 0.001$ ).

| Region                               | Hem. | BA | Number of Voxels | Peak Talairach Coordinates |     |     | Peak t(18) Score |
|--------------------------------------|------|----|------------------|----------------------------|-----|-----|------------------|
|                                      |      |    |                  | X                          | Y   | Z   |                  |
| <i>AC strategy &gt; SOM strategy</i> |      |    |                  |                            |     |     |                  |
| Inferior frontal gyrus               | R    | 6  | 6976             | 39                         | −4  | 35  | 7.340            |
| Superior frontal gyrus               | R    | 6  |                  | 0                          | 5   | 49  | 9.355            |
| Cingulate gyrus                      | R    | 32 |                  | 8                          | 16  | 32  | 6.487            |
| Middle frontal gyrus                 | R    | 6  |                  | 28                         | −6  | 52  | 5.365            |
| Supramarginal gyrus                  | L    | 40 | 12,876           | −54                        | −28 | 43  | 9.040            |
| Cuneus                               | R    | 7  |                  | 5                          | −77 | 45  | 11.382           |
| Superior parietal lobule             | R    | 7  |                  | 24                         | −73 | 41  | 6.113            |
| Inferior parietal lobule             | R    | 7  |                  | 26                         | −63 | 27  | 5.956            |
| Superior parietal lobule             | L    | 7  |                  | −20                        | −73 | 44  | 6.432            |
| Middle occipital gyrus               | R    | 17 | 1838             | 24                         | −88 | −11 | 6.890            |
| Thalamus                             | L    |    | 1064             | −7                         | −5  | 4   | 8.260            |
| Thalamus                             | R    |    |                  | 9                          | −1  | 1   | 5.907            |
| Inferior frontal gyrus               | L    | 9  | 1696             | −38                        | 7   | 26  | 9.525            |
| Lateral occipitotemporal gyrus       | L    | 37 | 608              | −43                        | −54 | −14 | 8.870            |
| Inferior occipital gyrus             | L    | 18 | 2754             | −23                        | −87 | −9  | 8.027            |
| Precentral gyrus                     | L    | 6  | 1061             | −30                        | −7  | 59  | 4.023            |
| <i>SOM strategy &gt; AC strategy</i> |      |    |                  |                            |     |     |                  |
| Superior frontal gyrus               | R    | 6  | 33,350           | 2                          | 45  | 37  | 11.022           |
| Superior frontal gyrus               | R    | 8  |                  | 21                         | 26  | 52  | 11.906           |
| Superior frontal gyrus               | L    | 8  |                  | −20                        | 30  | 51  | 5.554            |
| Postcentral gyrus                    | R    | 4  |                  | 54                         | −11 | 38  | 5.123            |
| Cingulate gyrus                      | R    | 31 | 170,216          | 4                          | −37 | 40  | 10.296           |
| Superior occipital gyrus             | R    | 18 |                  | 14                         | −76 | 18  | 8.654            |
| Middle temporal gyrus                | L    | 21 |                  | −44                        | −7  | −15 | 5.513            |
| Superior temporal gyrus              | L    | 42 |                  | −53                        | −36 | 12  | 9.229            |
| Superior occipital gyrus             | L    | 18 |                  | −18                        | −83 | 16  | 7.149            |
| Cuneus                               | L    | 30 |                  | −19                        | −68 | 13  | 7.106            |
| lingual gyrus                        | R    |    |                  | 22                         | −42 | −10 | 7.447            |
| lingual gyrus                        | L    |    |                  | −7                         | −67 | −5  | 6.506            |
| Precuneus                            | L    | 31 |                  | −13                        | −37 | 36  | 6.791            |
| Inferior temporal gyrus              | L    | 21 |                  | −48                        | −5  | −22 | 7.419            |
| Inferior occipital gyrus             | R    | 37 |                  | 51                         | −64 | 0   | 6.021            |
| Supramarginal gyrus                  | R    | 39 |                  | 55                         | −55 | 22  | 6.760            |
| Superior temporal gyrus              | R    | 22 |                  | 48                         | −32 | 1   | 6.752            |
| Middle temporal gyrus                | R    | 21 |                  | 50                         | −46 | 5   | 5.860            |
| Inferior frontal gyrus               | R    | 46 | 686              | 48                         | 31  | 7   | 5.528            |
| Inferior frontal gyrus               | L    | 45 | 3857             | −48                        | 38  | 5   | 8.285            |
| Inferior frontal gyrus               | L    | 46 |                  | −50                        | 31  | 16  | 8.412            |
